# Supplementary material
Source: bioRxiv or medRxiv preprint supplement (https://www.biorxiv.org/highwire/filestream/76684/field_highwire_adjunct_files/0/250217-1.pdf)
Supplement: Supplementary file [file 250217-1.pdf]

## **SUPPLEMENTARY METHODS**

### *Protease analysis:*

Serum MCPT1 was determined using the eBioscience Ready Set Go Kit (eBioscience, CA, USA).

### *Histological assessment*

Paraffin embedded formalin fixed lung lobes were sectioned and subjected to Periodic Acid-Schiff (PAS) and picro sirius red staining. Sections were scored and assessed as previously described<sup>1</sup>.

### *Total Collagen*

Total collagen was assessed in lung homogenate using the Sircol™ Soluble Collagen assay (Biocolor, Carrickfergus, UK) according to manufacturer's instructions.

### *Airway smooth muscle assessment*

Paraffin embedded formalin fixed lung lobes were sectioned and immunohistochemically stained with rabbit anti-mouse smooth muscle actin (Abcam, Cambridge, UK) as previously described<sup>2</sup>. Lung sections were imaged at x20 magnification and the size of the airway smooth muscle layer was measured. Briefly, the thickness of 10 airways were measured per mice and 10 measurements were taken per airway. The data is presented as an average. Data was blinded for analysis.

## SUPPLEMENTARY FIGURE LEGENDS

### Table S1: Flow cytometry antibodies used in the study

Lineage negative (Lin<sup>-</sup>) cells were defined as: CD11b<sup>-</sup>CD19<sup>-</sup>TCR-β<sup>-</sup>TER119<sup>-</sup>GR1<sup>-</sup>CD3<sup>-</sup>CD4<sup>-</sup>CD8<sup>-</sup>

### Figure S1: T<sub>FH</sub> accumulate over time in the mLN following HDM exposure.

Adult female BALB/c mice were exposed to either 25 μg house dust mite (HDM), 10 μg *alternaria alternata* (ALT) or 25 μl phosphate buffered saline (PBS), 3 times a week for up to 5 weeks. Flow cytometry was used to determine the frequency of T<sub>FH</sub> within cellular compartments following allergen exposure. T<sub>FH</sub> were defined as CXCR5<sup>+</sup>PD1<sup>+</sup>Foxp3<sup>-</sup>CD4<sup>+</sup>. Representative flow plots of T<sub>FH</sub> in PBS, ALT or HDM treated animals, pre-gated on CD4<sup>+</sup>CD3<sup>+</sup>Foxp3<sup>-</sup>CD44<sup>hi</sup>CD62L<sup>-</sup> lymphocytes. **A)** Mediastinal lymph node (mLN), **B)** Spleen, **C)** Lung tissue. Data is representative of n=5 per time-point and 2 independent experiments.

### Figure S2: T<sub>FH</sub> are not found in the circulation and do not accumulate over time.

Adult female BALB/c mice were exposed to either 25 μg house dust mite (HDM), 10 μg *alternaria alternata* (ALT) or 25 μl phosphate buffered saline (PBS), 3 times a week for up to 5 weeks. Flow cytometry was used to determine the frequency of T<sub>FH</sub> within the blood following allergen exposure. T<sub>FH</sub> were defined as CXCR5<sup>+</sup>PD1<sup>+</sup>Foxp3<sup>-</sup>CD4<sup>+</sup>. **A)** Representative flow plots of T<sub>FH</sub> in PBS, HDM or ALT treated animals, pre-gated on CD4<sup>+</sup>CD3<sup>+</sup>Foxp3<sup>-</sup>CD44<sup>hi</sup>CD62L<sup>-</sup> lymphocytes. **B)** HDM exposure animals, **C)** ALT exposure animals. Data is representative of n=5 per time-point and 2 independent experiments.

### Figure S3: T<sub>FH</sub> accumulate over time following HDM exposure.

Adult female BALB/c mice were exposed to either 25 µg house dust mite (HDM), 10 µg *alternaria alternata* (ALT) or 25 µl phosphate buffered saline (PBS), 3 times a week for up to 5 weeks. Flow cytometry was used to determine the frequency of germinal centre (GC) B cells within cellular compartments following allergen exposure. GC B cells were defined as CD38<sup>+</sup>GL7<sup>+</sup>FAS<sup>+</sup>CD19<sup>+</sup>B220<sup>+</sup> cells. Representative flow plots of GC B cells in PBS, ALT or HDM treated animals, pre-gated on CD19<sup>+</sup>B220<sup>+</sup> lymphocytes. **A)** Mediastinal lymph node (mLN), **B)** Lung tissue, **C)** Spleen. Data is representative of n=5 per time-point and 2 independent experiments.

**Figure S4: Schematic of experimental design of ICOS-L blockade during chronic allergic airway disease.**

Adult female BALB/c mice were exposed (i.n) to 25 µg house dust mite (HDM), 10 µg *alternaria alternata* (ALT) or 25 µl phosphate buffered saline (PBS), 3 times a week for 5 weeks. From the start of week 4 mice were also administered 150 µg anti-ICOS-L (α-ICOS-L) or isotype control (2A3) antibody i.p, 3 times a week. Mice were culled at the end of week 5.

**Figure S5: Mast cell degranulation is reduced by ICOS-L blockade during house dust mite driven chronic allergic airway disease.**

Adult female BALB/c mice were exposed (i.n) to 25 µg house dust mite (HDM), 10 µg *alternaria alternata* (ALT) or 25 µl phosphate buffered saline (PBS), 3 times a week for 5 weeks. From the start of week 4 mice were also administered 150 µg anti-ICOS-L (α-ICOS-L) or isotype control (2A3) antibody i.p, 3 times a week. Mice were culled at the end of week 5. Serum MCPT1 was determined by ELISA **A)** HDM study, **B)** ALT study. \*  $P < 0.05$ , \*\*  $p < 0.01$ , \*\*\*  $p < 0.001$ . Representative data. n=4-6.

**Figure S6: Lung eosinophil proportions were unchanged by ICOS-L blockade during chronic allergic airway disease.**

Adult female BALB/c mice were exposed (i.n) to 25 µg house dust mite (HDM), 10 µg *alternaria alternata* (ALT) or 25 µl phosphate buffered saline (PBS), 3 times a week for 5 weeks. From the start of week 4 mice were also administered 150 µg anti-ICOS-L (α-ICOS-L) or isotype control (2A3) antibody i.p, 3 times a week. Mice were culled at the end of week 5. Flow cytometry was used to determine the frequency of eosinophils in the lungs following allergen exposure. Eosinophils were defined as CD68<sup>-</sup>CD11c<sup>-</sup>CD11b<sup>+</sup>Siglec<sup>hi</sup>. **A)** HDM study, **B)** ALT study. Statistical significance was determined using a Mann Whitney U test. \*  $P < 0.05$ , \*\*  $p < 0.01$ , \*\*\*  $p < 0.001$ . Data shown is pooled from two independent experiments, n=4-12. ALT data is based on one study, n=4-6.

**Figure S7: Therapeutic ICOS-L blockade does not alter mucus hyper-secretion, collagen deposition or airway smooth muscle thickening.**

Adult female BALB/c mice were exposed (i.n) to 25 µg house dust mite (HDM), 10 µg *alternaria alternata* (ALT) or 25 µl phosphate buffered saline (PBS), 3 times a week for 5 weeks. From the start of week 4 mice were also administered 150 µg anti-ICOS-L (α-ICOS-L) or isotype control (2A3) antibody (i.p) 3 times a week. Mice were culled at the end of week 5. **A-B)** Representative images of Periodic Acid-Schiff (PAS) staining on parafilm embedded formalin fixed (PEFF) lung sections used to score mucus hyper-secretion. **A)** HDM+2A3, **B)** HDM+α-ICOS-L, **C)** Quantification of PAS scoring. **D-E)** Representative staining of Picro-Sirus Red on PEFF lung used to determine collagen I and III deposition. **D)** HDM+2A3, **E)** HDM+α-ICOS-L, **F)** Total collagen in the lungs determined by Sircol soluble collagen assay. **G-H)** Representative staining of airway smooth muscle cells and myofibroblasts identified by immunohistochemical staining of α-smooth muscle actin (α-SMA). **G)** HDM+2A3, **H)** HDM+α-

ICOS-L, **I**) Airway smooth muscle layer thickness was measured from  $\alpha$ -SMA stained sections. Images were taken at x20 magnification. Statistical significance was determined using a Mann Whitney U test. n=8-12.

**Figure S8: IL-17A<sup>+</sup> CD4<sup>+</sup> T cells are not directly targeted by ICOS-L blockade.**

Adult female BALB/c mice were exposed to either 25  $\mu$ g house dust mite (HDM), 10  $\mu$ g *alternaria alternata* (ALT) or 25  $\mu$ l phosphate buffered saline (PBS), 3 times a week for up to 5 weeks. Flow cytometry was used to determine the frequency of lung cellular populations. **A)** Representative gating of IL-17A<sup>+</sup> CD4<sup>+</sup> T cells following allergen and 2A3 or  $\alpha$ -ICOS-L treatment. These populations were quantified **B)** Proportions of lung IL-17A<sup>+</sup> CD4<sup>+</sup> - HDM study, **C)** Number of lung IL-17A<sup>+</sup> CD4<sup>+</sup> - HDM study, **D)** Proportions of lung IL-17A<sup>+</sup> CD4<sup>+</sup> - ALT study, **E)** Number of lung IL-17A<sup>+</sup> CD4<sup>+</sup> - ALT study. Statistical significance was determined using a Mann Whitney U test. \*  $P < 0.05$ , \*\*  $p < 0.01$ , \*\*\*  $p < 0.001$ . HDM data shown is pooled from two independent experiments, n=8-12. ALT data is based on one study, n=4-6.

**Figure S9: IL-13<sup>+</sup> and IL-17A<sup>+</sup> CD4<sup>+</sup> ILCs are not directly targeted by ICOS-L blockade.**

Adult female BALB/c mice were exposed to either 25  $\mu$ g house dust mite (HDM), 10  $\mu$ g *alternaria alternata* (ALT) or 25  $\mu$ l phosphate buffered saline (PBS), 3 times a week for up to 5 weeks. Flow cytometry was used to determine the frequency of lung cellular populations. **A)** IL-13<sup>+</sup> ILCs – HDM study, **B)** IL-13<sup>+</sup> ILCs – ALT study, **C)** Representative gating of IL-17A<sup>+</sup> ILCs following allergen and 2A3 or  $\alpha$ -ICOS-L treatment. **D)** Frequency of IL-17A<sup>+</sup> ILCs – HDM study, **E)** Number of IL-17A<sup>+</sup> ILCs – HDM study, **F)** Frequency of IL-17A<sup>+</sup> ILCs – ALT study, **G)** Number of IL-17A<sup>+</sup> ILCs – ALT study. Statistical significance was determined using

a Mann Whitney U test. \*  $P < 0.05$ , \*\*  $p < 0.01$ , \*\*\*  $p < 0.001$ . HDM data shown is pooled from two independent experiments,  $n = 8-12$ . ALT data is based on one study,  $n = 4-6$ .

**Figure S10: Graphical summary of the effects of blocking ICOS/ICOS-L interactions on established chronic allergic airway disease**

1. Saglani S, Mathie SA, Gregory LG, Bell MJ, Bush A, Lloyd CM. Pathophysiological Features of Asthma Develop in Parallel in House Dust Mite–Exposed Neonatal Mice. *American Journal of Respiratory Cell and Molecular Biology* 2009; **41**(3): 281-289.
2. Gregory LG, Mathie SA, Walker SA, Pegorier S, Jones CP, Lloyd CM. Overexpression of Smad2 drives house dust mite–mediated airway remodeling and airway hyperresponsiveness via activin and IL-25. *American journal of respiratory and critical care medicine* 2010; **182**(2): 143-154.

| Target        | Clone        | Supplier      | Concentration | Fluorochrome |
|---------------|--------------|---------------|---------------|--------------|
| B220          | RA3-6B2      | Biolegend     | 1:200         | BV510        |
| CD3e          | 145-2C11     | eBioscience   | 1:200         | PE-CF594     |
| CD4           | RM4-5        | Biolegend     | 1:100         | APC/CY7      |
| CD8           | 53-6.7       | Biolegend     | 1:200         | BV711        |
| CD11b         | M1/70        | Biolegend     | 1:200         | BV711        |
| CD11b         | M1/70        | eBioscience   | 1:100         | PERCP-Cy5.5  |
| CD19          | 6D5          | Biolegend     | 1:200         | BV605        |
| CD19          | 6D5          | eBioscience   | 1:100         | PERCP-Cy5.5  |
| CD38          | 90           | eBioscience   | 1:200         | Alexa700     |
| CD44          | IM7          | Biolegend     | 1:200         | PERCP-Cy5.5  |
| CD45          | 30-F11       | Biolegend     | 1:200         | FITC         |
| CD62L         | MEL-14       | Biolegend     | 1:200         | BV605        |
| CD90-2        | 30-H12       | Biolegend     | 1:100         | Alexa700     |
| CXCR5         | L138D7       | Biolegend     | 1:50          | BV421        |
| FAS           | 15A7         | eBioscience   | 1:100         | PERCP-Cy5.5  |
| Foxp3         | 11-5773-82   | eBioscience   | 1:100         | FITC         |
| GL7           | GL7          | Biolegend     | 1:100         | FITC         |
| GR1           | RB6-8C5      | eBioscience   | 1:100         | PERCP-Cy5.5  |
| Ia/Ie         | M5/114.15.2  | Biolegend     | 1:300         | BV421        |
| IFN- $\gamma$ | XMG1.2       | Biolegend     | 1:50          | BV510        |
| IgD           | 11-26c.2a    | Biolegend     | 1:100         | Pacific Blue |
| IgM           | RMM-1        | Biolegend     | 1:50          | APC/CY7      |
| IL-13         | eBio13A      | eBioscience   | 1:100         | PE/CY7       |
| IL-17A        | TC11-18H10.1 | Biolegend     | 1:100         | BV605        |
| Nkp46         | 29A1.4       | Biolegend     | 1:50          | BV421        |
| PD1           | RMP1-30      | Biolegend     | 1:200         | PE/CY7       |
| Siglecf       | E50-2440     | BD Pharmingen | 1:100         | PE           |
| TCR- $\beta$  | H57-597      | Biolegend     | 1:100         | PERCP-Cy5.5  |
| TER119        | TER119       | eBioscience   | 1:100         | PERCP-Cy5.5  |

**Table S1: Flow cytometry antibodies used in the study**

Lineage negative (Lin<sup>-</sup>) cells were defined as: CD11b<sup>-</sup>CD19<sup>-</sup>TCR- $\beta$ <sup>-</sup>TER119<sup>-</sup>GR1<sup>-</sup>CD3<sup>-</sup>CD4<sup>-</sup>CD8<sup>-</sup>

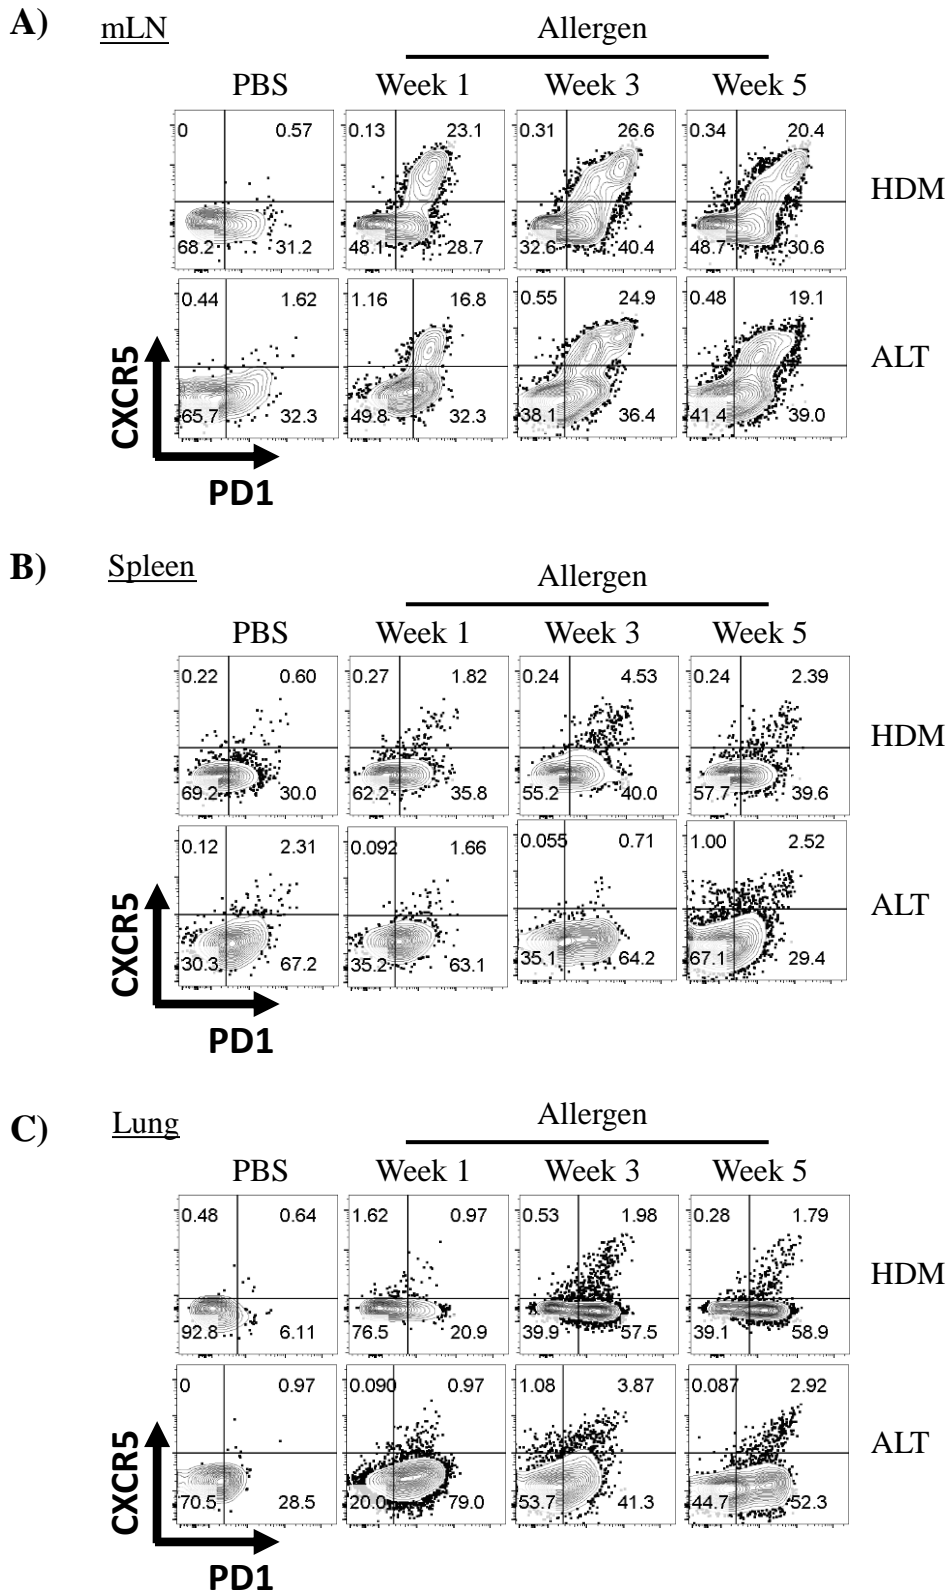

**Figure S1:  $T_{FH}$  accumulate over time following HDM exposure.**

Adult female BALB/c mice were exposed to either 25  $\mu$ g house dust mite (HDM), 10  $\mu$ g *alternaria alternata* (ALT) or 25  $\mu$ l phosphate buffered saline (PBS), 3 times a week for up to 5 weeks. Flow cytometry was used to determine the frequency of  $T_{FH}$  within cellular compartments following allergen exposure.  $T_{FH}$  were defined as CXCR5<sup>+</sup>PD1<sup>+</sup>Foxp3<sup>+</sup>CD4<sup>+</sup>. Representative flow plots of  $T_{FH}$  in PBS, ALT or HDM treated animals, pre-gated on CD4<sup>+</sup>CD3<sup>+</sup>Foxp3<sup>+</sup>CD44<sup>hi</sup>CD62L<sup>-</sup> lymphocytes. **A)** Mediastinal lymph node (mLN), **B)** Spleen, **C)** Lung tissue. Data is representative of n=5 per time-point and 2 independent experiments.



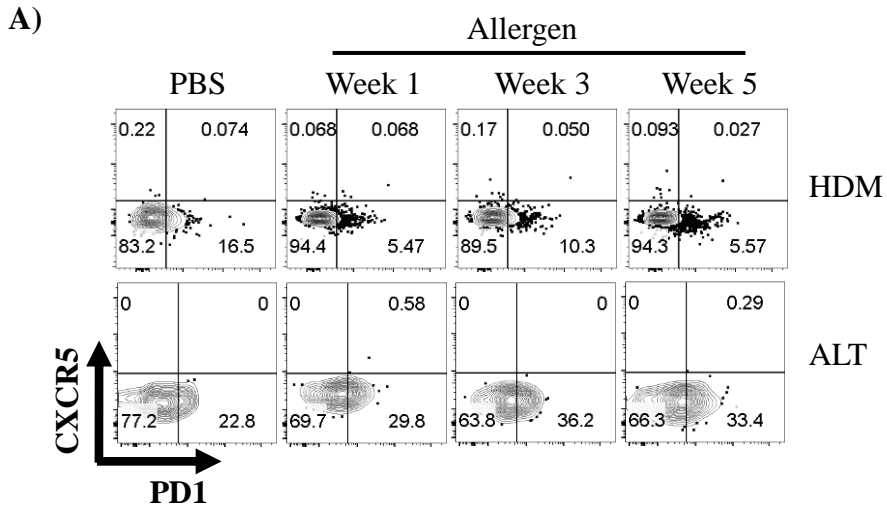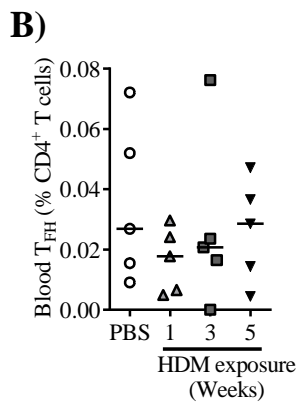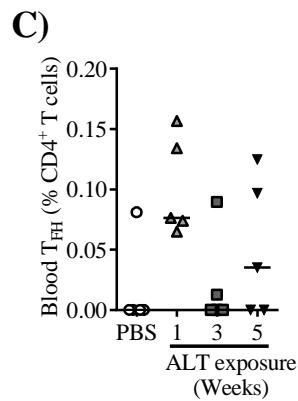

**Figure S2:  $T_{FH}$  are not found in the circulation and do not accumulate over time.**

Adult female BALB/c mice were exposed to either 25  $\mu$ g house dust mite (HDM), 10  $\mu$ g *alternaria alternata* (ALT) or 25  $\mu$ l phosphate buffered saline (PBS), 3 times a week for up to 5 weeks. Flow cytometry was used to determine the frequency of  $T_{FH}$  within the blood following allergen exposure.  $T_{FH}$  were defined as CXCR5<sup>+</sup>PD1<sup>+</sup>Foxp3<sup>-</sup>CD4<sup>+</sup>. **A)** Representative flow plots of  $T_{FH}$  in PBS, HDM or ALT treated animals, pre-gated on CD4<sup>+</sup>CD3<sup>+</sup>Foxp3<sup>-</sup>CD44<sup>hi</sup>CD62L<sup>-</sup> lymphocytes. **B)** HDM exposure animals, **C)** ALT exposure animals. Data is representative of n=5 per time-point and 2 independent experiments.

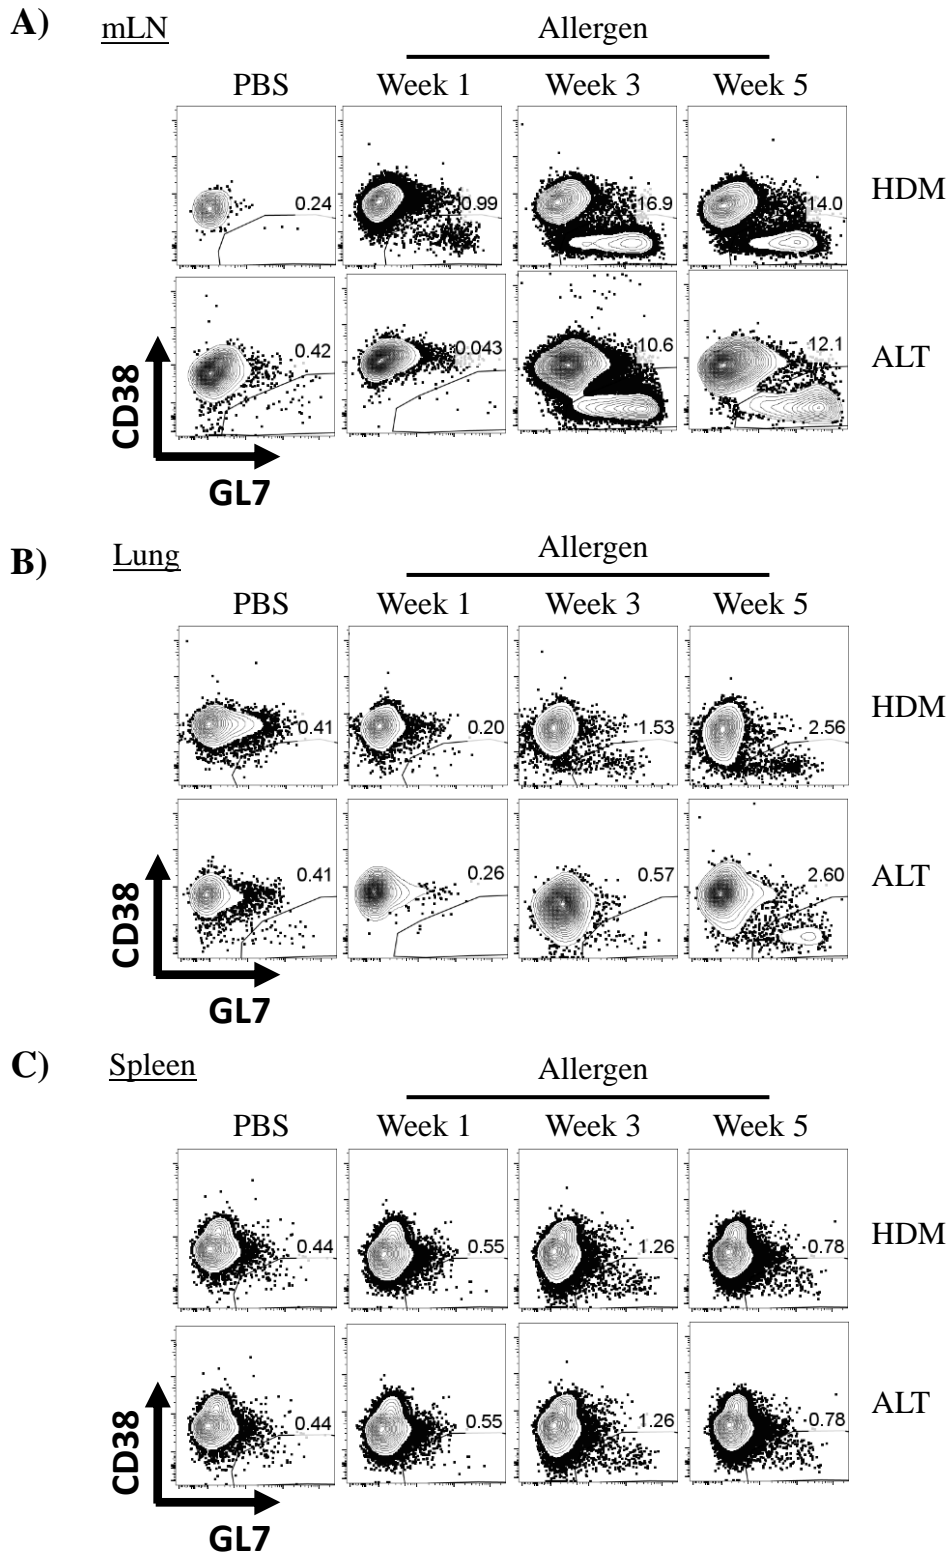

**Figure S3: T<sub>FH</sub> accumulate over time following HDM exposure.**

Adult female BALB/c mice were exposed to either 25  $\mu$ g house dust mite (HDM), 10  $\mu$ g *alternaria alternata* (ALT) or 25  $\mu$ l phosphate buffered saline (PBS), 3 times a week for up to 5 weeks. Flow cytometry was used to determine the frequency of germinal centre (GC) B cells within cellular compartments following allergen exposure. GC B cells were defined as CD38<sup>-</sup>GL7<sup>+</sup>FAS<sup>+</sup>CD19<sup>+</sup>B220<sup>+</sup> cells. Representative flow plots of GC B cells in PBS, ALT or HDM treated animals, pre-gated on CD19<sup>+</sup>B220<sup>+</sup> lymphocytes. **A)** Mediastinal lymph node (mLN), **B)** Lung tissue, **C)** Spleen. Data is representative of n=5 per time-point and 2 independent experiments.

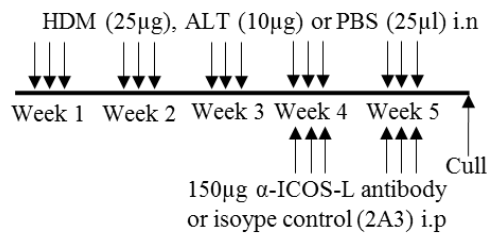

**Figure S4: Schematic of experimental design of ICOS-L blockade during chronic allergic airway disease.**

Adult female BALB/c mice were exposed (i.n) to 25 µg house dust mite (HDM), 10 µg *alternaria alternata* (ALT) or 25 µl phosphate buffered saline (PBS), 3 times a week for 5 weeks. From the start of week 4 mice were also administered 150 µg anti-ICOS-L (α-ICOS-L) or isotype control (2A3) antibody i.p, 3 times a week. Mice were culled at the end of week 5.

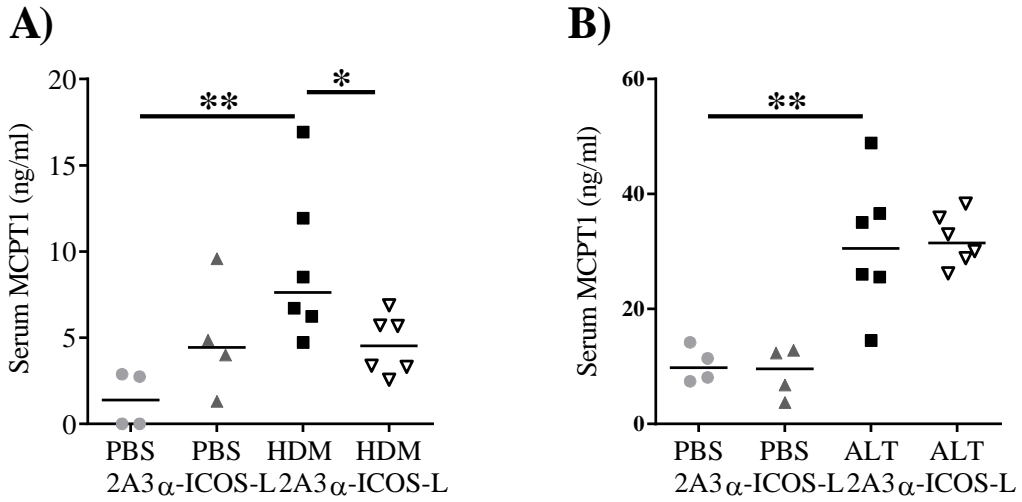

**Figure S5: Mast cell degranulation is reduced by ICOS-L blockade during house dust mite driven chronic allergic airway disease.**

Adult female BALB/c mice were exposed (i.n) to 25  $\mu$ g house dust mite (HDM), 10  $\mu$ g *alternaria alternata* (ALT) or 25  $\mu$ l phosphate buffered saline (PBS), 3 times a week for 5 weeks. From the start of week 4 mice were also administered 150  $\mu$ g anti-ICOS-L ( $\alpha$ -ICOS-L) or isotype control (2A3) antibody i.p, 3 times a week. Mice were culled at the end of week 5. Serum MCPT1 was determined by ELISA **A)** HDM study, **B)** ALT study. \*  $P < 0.05$ , \*\*  $p < 0.01$ , \*\*\*  $p < 0.001$ . Representative data. n=4-6.

**A)**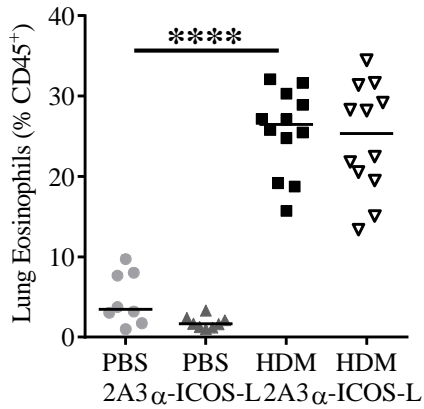**B)**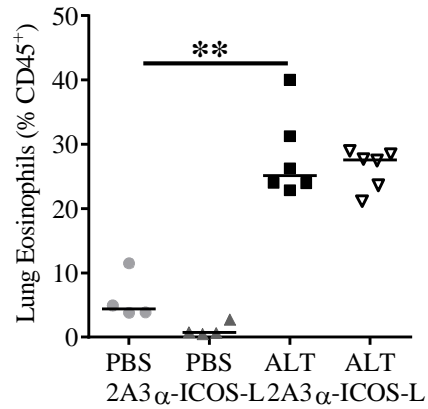

**Figure S6: Lung eosinophil proportions were unchanged by ICOS-L blockade during chronic allergic airway disease.**

Adult female BALB/c mice were exposed (i.n) to 25  $\mu$ g house dust mite (HDM), 10  $\mu$ g *alternaria alternata* (ALT) or 25  $\mu$ l phosphate buffered saline (PBS), 3 times a week for 5 weeks. From the start of week 4 mice were also administered 150  $\mu$ g anti-ICOS-L ( $\alpha$ -ICOS-L) or isotype control (2A3) antibody i.p, 3 times a week. Mice were culled at the end of week 5. Flow cytometry was used to determine the frequency of eosinophils in the lungs following allergen exposure. Eosinophils were defined as CD68<sup>+</sup>CD11c<sup>+</sup>CD11b<sup>+</sup>SiglecF<sup>hi</sup>. **A)** HDM study, **B)** ALT study. Statistical significance was determined using a Mann Whitney U test. \*  $P < 0.05$ , \*\*  $p < 0.01$ , \*\*\*  $p < 0.001$ . Data shown is pooled from two independent experiments, n=4-12. ALT data is based on one study, n=4-6.

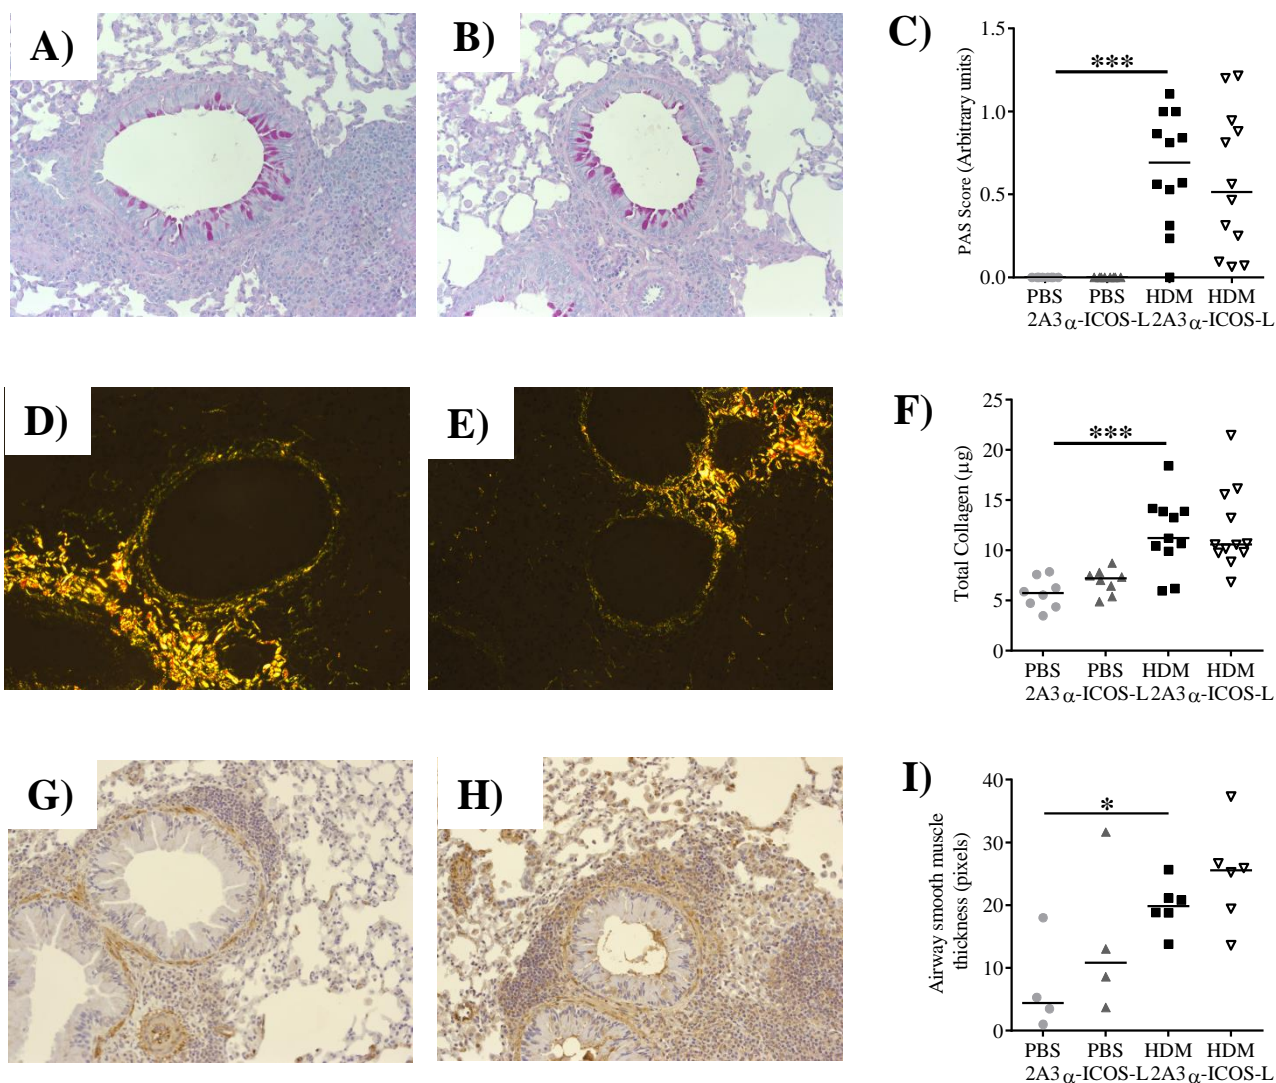

**Figure S7: Therapeutic ICOS-L blockade does not alter mucus hyper-secretion, collagen deposition or airway smooth muscle thickening.**

Adult female BALB/c mice were exposed (i.n) to 25 µg house dust mite (HDM), 10 µg *alternaria alternata* (ALT) or 25 µl phosphate buffered saline (PBS), 3 times a week for 5 weeks. From the start of week 4 mice were also administered 150 µg anti-ICOS-L (α-ICOS-L) or isotype control (2A3) antibody (i.p) 3 times a week. Mice were culled at the end of week 5. **A-B)** Representative images of Periodic Acid-Schiff (PAS) staining on paraffin embedded formalin fixed (PEFF) lung sections used to score mucus hyper-secretion. **A)** HDM+2A3, **B)** HDM+α-ICOS-L, **C)** Quantification of PAS scoring. **D-E)** Representative staining of Pico-Sirus Red on PEFF lung used to determine collagen I and III deposition. **D)** HDM+2A3, **E)** HDM+α-ICOS-L, **F)** Total collagen in the lungs determined by Sircol soluble collagen assay. **G-H)** Representative staining of airway smooth muscle cells and myofibroblasts identified by immunohistochemical staining of α-smooth muscle actin (α-SMA). **G)** HDM+2A3, **H)** HDM+α-ICOS-L, **I)** Airway smooth muscle layer thickness was measured from α-SMA stained sections. Images were taken at x20 magnification. Statistical significance was determined using a Mann Whitney U test. n=8-12.

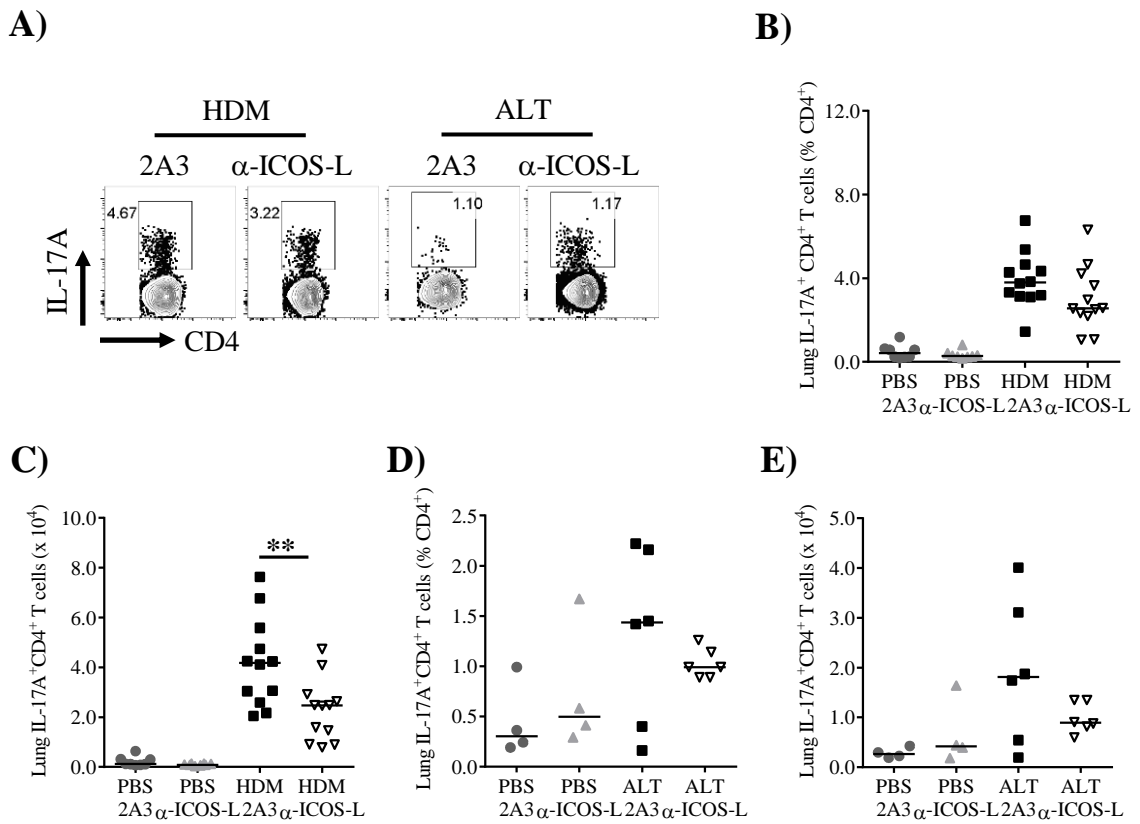

**Figure S8: IL-17A<sup>+</sup> CD4<sup>+</sup> T cells are not directly targeted by ICOS-L blockade.**

Adult female BALB/c mice were exposed to either 25 µg house dust mite (HDM), 10 µg *alternaria alternata* (ALT) or 25 µl phosphate buffered saline (PBS), 3 times a week for up to 5 weeks. Flow cytometry was used to determine the frequency of lung cellular populations. **A)** Representative gating of IL-17A<sup>+</sup> CD4<sup>+</sup> T cells following allergen and 2A3 or α-ICOS-L treatment. These populations were quantified **B)** Proportions of lung IL-17A<sup>+</sup> CD4<sup>+</sup> - HDM study, **C)** Number of lung IL-17A<sup>+</sup> CD4<sup>+</sup> - HDM study, **D)** Proportions of lung IL-17A<sup>+</sup> CD4<sup>+</sup> - ALT study, **E)** Number of lung IL-17A<sup>+</sup> CD4<sup>+</sup> - ALT study. Statistical significance was determined using a Mann Whitney U test. \*  $P < 0.05$ , \*\*  $p < 0.01$ , \*\*\*  $p < 0.001$ . HDM data shown is pooled from two independent experiments,  $n = 8-12$ . ALT data is based on one study,  $n = 4-6$ .

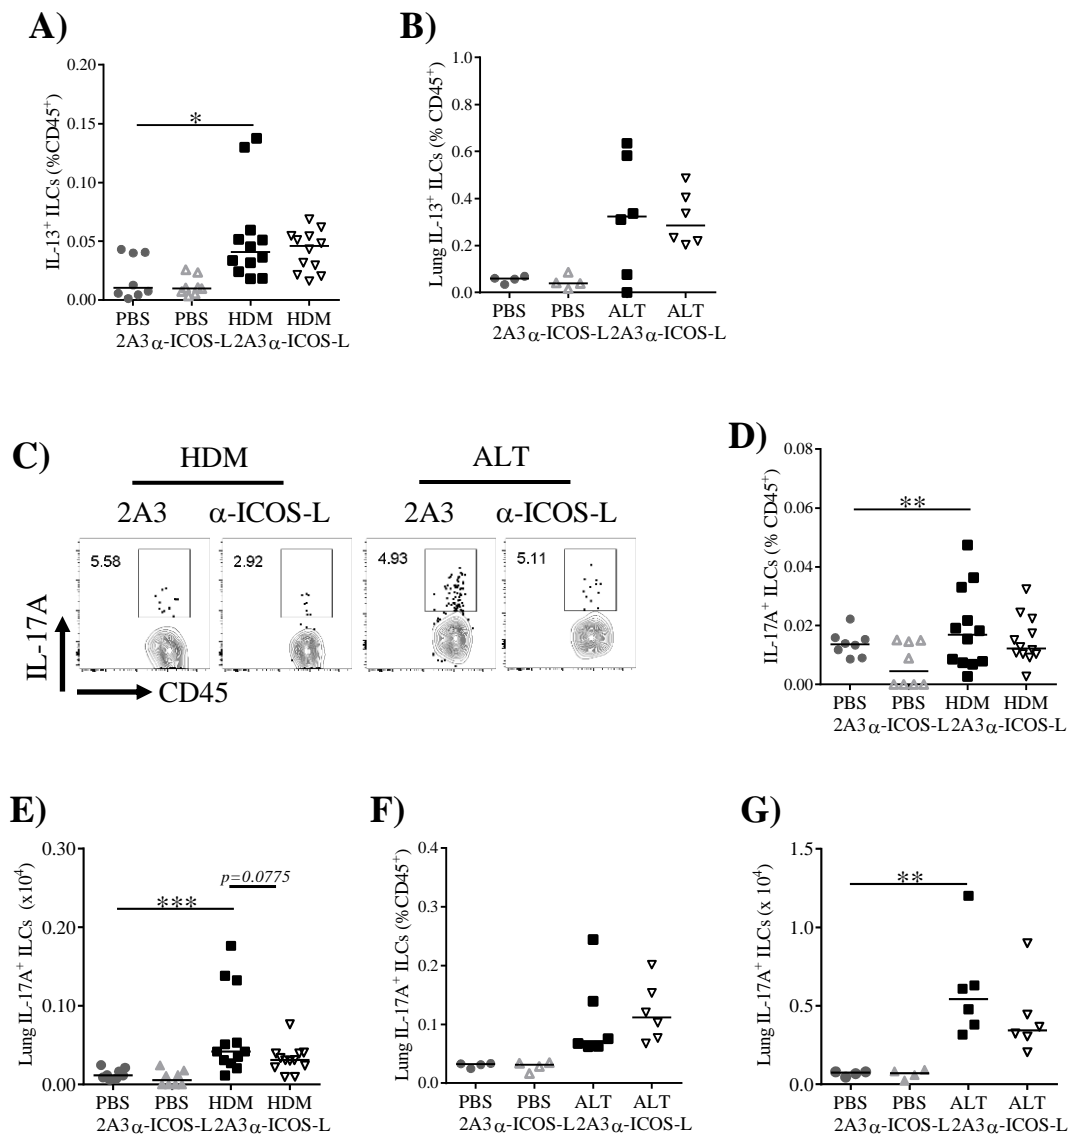

**Figure S9: IL-13<sup>+</sup> and IL-17A<sup>+</sup> CD4<sup>+</sup> ILCs are not directly targeted by ICOS-L blockade.**

Adult female BALB/c mice were exposed to either 25 µg house dust mite (HDM), 10 µg *alternaria alternata* (ALT) or 25 µl phosphate buffered saline (PBS), 3 times a week for up to 5 weeks. Flow cytometry was used to determine the frequency of lung cellular populations. **A)** IL-13<sup>+</sup> ILCs – HDM study, **B)** IL-13<sup>+</sup> ILCs – ALT study, **C)** Representative gating of IL-17A<sup>+</sup> ILCs following allergen and 2A3 or α-ICOS-L treatment. **D)** Frequency of IL-17A<sup>+</sup> ILCs – HDM study, **E)** Number of IL-17A<sup>+</sup> ILCs – HDM study, **F)** Frequency of IL-17A<sup>+</sup> ILCs – ALT study, **G)** Number of IL-17A<sup>+</sup> ILCs – ALT study. Statistical significance was determined using a Mann Whitney U test. \*  $P < 0.05$ , \*\*  $p < 0.01$ , \*\*\*  $p < 0.001$ . HDM data shown is pooled from two independent experiments, n=8-12. ALT data is based on one study, n=4-6.



# Chronic allergen exposure

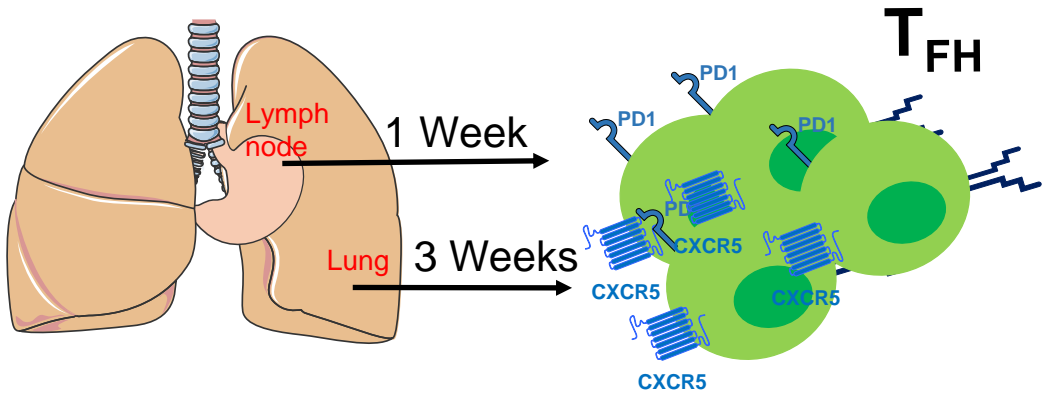

## Allergen exposure

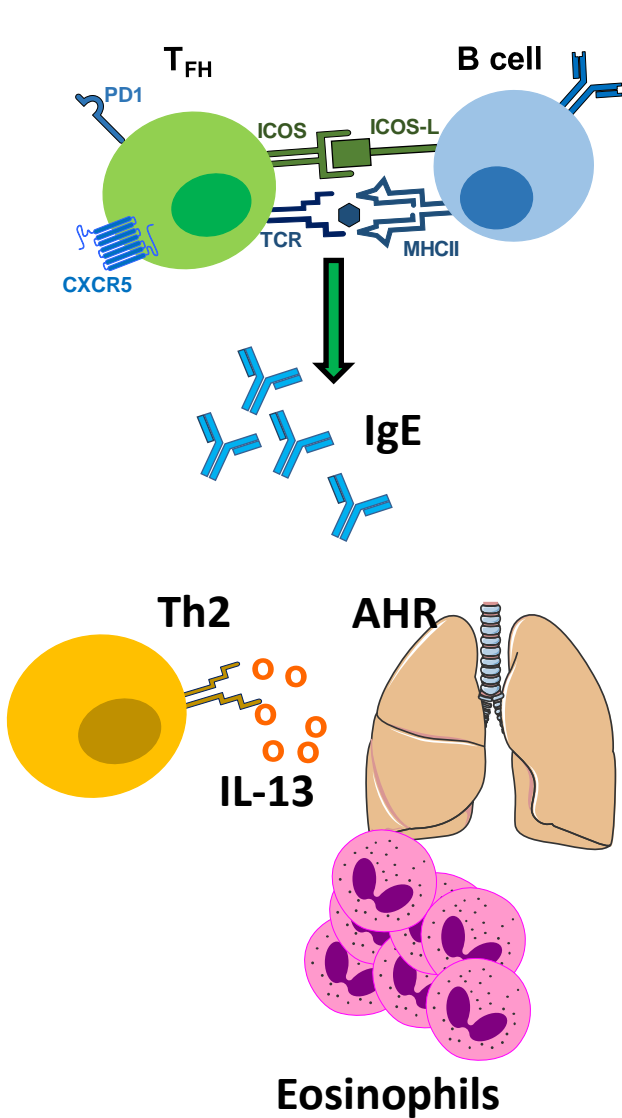

## Allergen and ICOS-L blockade

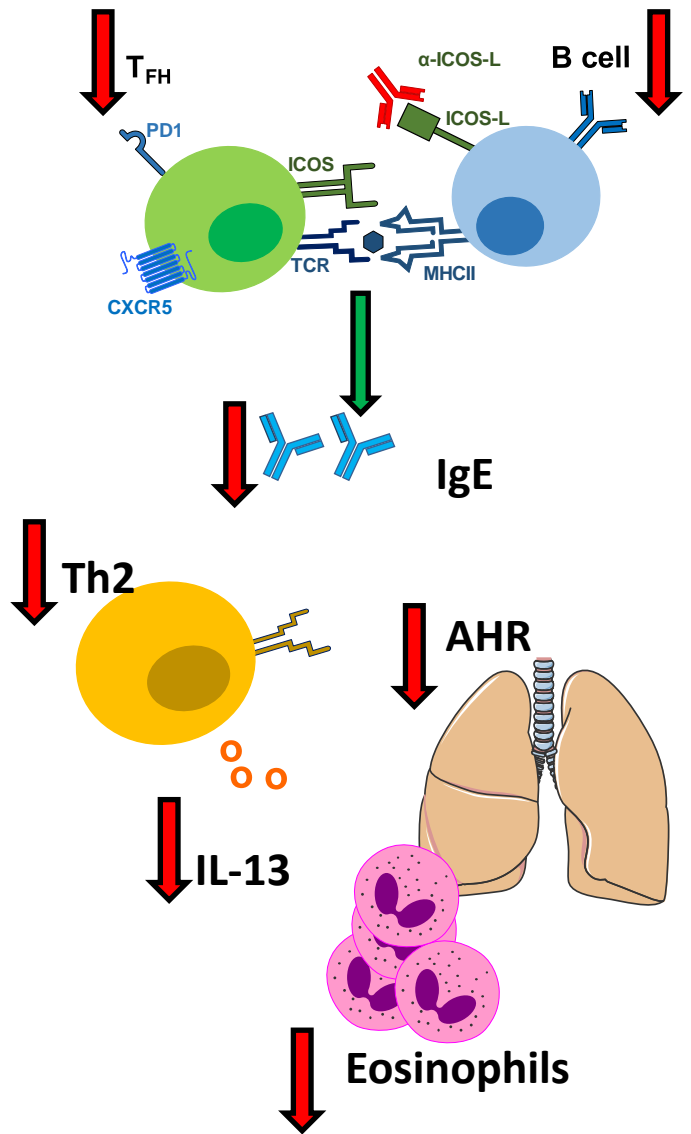

Figure S10: Graphical summary of the effects of blocking ICOS/ICOS-L interactions on established chronic allergic airway disease
